# Supplementary material for: Virtual Screening in Search for a Chemical Probe for Angiotensin-Converting Enzyme 2 (ACE2)
Source: MDPI journal article supplement (doi:10.3390/molecules26247584), 2021-12-14

# Virtual screening in search for a chemical probe for angiotensin-converting enzyme 2 (ACE2)

## Supporting Information

**List S1.** List of ligands from the ChEMBL database with experimentally measured activities  $K_i$  or  $IC_{50}$  against ACE2

### Smiles Molecule ChEMBL ID

CC[C@@H](C)[C@H](S)C(=O)N[C@@H](Cc1ccc(O)cc1)C(=O)O CHEMBL253224

CC[C@@H](C)[C@H](S)C(=O)N[C@@H](Cc1cccc(Oc2ccccc2)c1)C(=O)O CHEMBL252003

CCCC[C@H](S)C(=O)N[C@@H](Cc1ccc(-c2ccccc2)cc1)C(=O)O CHEMBL257270

CC[C@H](S)C(=O)N[C@@H](Cc1ccc(-c2ccccc2)cc1)C(=O)O CHEMBL257726

O=C(S)N[C@@H](Cc1ccc(-c2ccccc2)cc1)C(=O)O CHEMBL258333

O=C(O)[C@H](Cc1ccc(-c2ccccc2)cc1)NC(=O)[C@H](S)Cc1ccccc1 CHEMBL163454

CC[C@@H](C)[C@H](S)C(=O)N[C@@H](Cc1cccc1OCC1ccccc1)C(=O)O CHEMBL254493

CC[C@@H](C)[C@H](S)C(=O)N[C@@H](Cc1cccc2ccccc12)C(=O)O CHEMBL400527

CC[C@@H](C)[C@H](S)C(=O)N[C@@H](Cc1ccc(OCc2ccc(F)cc2F)cc1)C(=O)O CHEMBL398771

CC[C@@H](C)[C@H](S)C(=O)N[C@@H](Cc1ccc(OCc2ccc(F)cc2)cc1)C(=O)O CHEMBL254911

CC[C@@H](C)[C@H](S)C(=O)N[C@@H](C)C(=O)O CHEMBL254900

CC[C@@H](C)[C@H](S)C(=O)N[C@@H](Cc1ccc(-c2ccccc2)cc1)C(=O)O CHEMBL252391

CC[C@@H](C)[C@H](S)C(=O)N[C@@H](Cc1ccc(OCc2cc(C(F)(F)F)cc(C(F)(F)F)c2)cc1)C(=O)O CHEMBL252009

CC[C@H](C)[C@H](S)C(=O)N[C@@H](Cc1ccc(-c2ccccc2)cc1)C(=O)O CHEMBL269996

CC[C@@H](C)[C@H](S)C(=O)N[C@@H](Cc1cccc(-c2ccccc2)c1)C(=O)O CHEMBL401397

CC[C@@H](C)[C@H](S)C(=O)N[C@@H](Cc1ccccc1)C(=O)O CHEMBL400526

CC[C@@H](C)[C@H](S)C(=O)N[C@@H](Cc1cccc(OCc2ccccc2)c1)C(=O)O CHEMBL254495

CC(C)C[C@H](S)C(=O)N[C@@H](Cc1ccc(-c2ccccc2)cc1)C(=O)O CHEMBL271225

CC[C@@H](C)[C@H](S)C(=O)N[C@@H](Cc1ccccc1-c1ccccc1)C(=O)O CHEMBL398545

CC[C@@H](C)[C@H](S)C(=O)N[C@@H](Cc1ccc(Oc2ccccc2)cc1)C(=O)O CHEMBL254282

O=C(O)[C@H](Cc1ccc(-c2ccccc2)cc1)NC(=O)[C@@H](S)C1CCCC1 CHEMBL404117

O=C(N[C@@H](Cc1ccc(-c2ccccc2)cc1)C(=O)O)[C@@H](S)Cc1ccccc1 CHEMBL350414

O=C(N[C@@H](Cc1ccc(-c2ccccc2)cc1)C(=O)O)[C@@H](S)CC1CCCC1 CHEMBL271224

CC(C)(C)C[C@H](S)C(=O)N[C@@H](Cc1ccc(-c2ccccc2)cc1)C(=O)O CHEMBL271223

O=C(O)[C@H](Cc1ccc(-c2ccccc2)cc1)NC(=O)[C@@H](S)C1CCCC1 CHEMBL257026

CC(=O)N[C@@H](Cc1c[nH]cn1)C(=O)N[C@@H](CC(C)C)P(=O)(O)CC(Cc1ccc(-c2ccccc2)no1)C(=O)O  
CHEMBL408182

CC(C)C[C@H](NC(=O)[C@@H]1CCCN1C(=O)[C@H](CO)NC(=O)[C@H](CS)NC(=O)[C@H](Cc1cnc[nH]1)NC(=O)[C@H](CO)NC(=O)[C@H](Cc1ccc(O)cc1)NC(=O)[C@@H](CC(=O)O)NC(=O)CN)C(=O)N[C@@H](CCCNC(=N)N)C(=O)N[C@@H](Cc1ccc(O)cc1)C(=O)N[C@@H](Cc1ccc(O)cc1)C(=O)N1CCC[C@H]1C(=O)N[C@@H](Cc1c[nH]c2ccccc12)C(=O)N[C@@H](Cc1c[nH]c2ccccc12)C(=O)N[C@@H](CCCCN)C(=O)N[C@@H](CS)C(=O)N[C@@H](C(=O)N[C@@H](Cc1ccc(O)cc1)C(=O)N1CCC[C@H]1C(=O)N[C@@H](CC(=O)O)C(=O)N1CCC[C@H]1C(=O)O)[C@@H](C)O CHEMBL1240682

CC(=O)N[C@@H](CC(C)C)C(=O)N1CCC[C@@H]1P(=O)(O)CC(Cc1ccc(-c2ccccc2)no1)C(=O)O  
CHEMBL261121

CC(C)C[C@@H](N)P(=O)(O)C[C@@H](Cc1ccccc1)C(=O)O CHEMBL405232

CC(C)(S)C(=O)N[C@@H](Cc1ccc(-c2ccccc2)cc1)C(=O)O CHEMBL404044

C[C@H](S)C(=O)N[C@@H](Cc1ccc(-c2ccccc2)cc1)C(=O)O CHEMBL257727

CC[C@@H](C)[C@H](S)C(=O)N[C@@H](Cc1ccc(OCc2ccc(C(F)(F)F)cc2)cc1)C(=O)O CHEMBL251809

CC[C@@H](C)[C@H](S)C(=O)N[C@@H](Cc1ccccc1Oc1ccccc1)C(=O)O CHEMBL251804

CC(C)C[C@@H](NC(=O)OCc1ccccc1)P(=O)(O)C[C@@H](Cc1ccccc1)C(=O)O CHEMBL264665

O=C(N[C@@H](Cc1ccc(-c2ccccc2)cc1)C(=O)O)[C@@H](S)Cc1ccc2ccccc2c1 CHEMBL272925

O=C(O)[C@H](Cc1ccc(-c2ccccc2)cc1)NC(=O)[C@@H](S)c1ccccc1 CHEMBL437595

O=C(O)[C@H](Cc1ccccc1)CP(=O)(O)[C@H]1CCCN1 CHEMBL261033

CC(=O)N[C@@H](Cc1c[nH]cn1)C(=O)N1CCC[C@@H]1P(=O)(O)C[C@@H](Cc1ccccc1)C(=O)O  
CHEMBL261423

CC(=O)N[C@@H](CCCCN)C(=O)N1CCC[C@@H]1P(=O)(O)C[C@@H](Cc1ccccc1)C(=O)O CHEMBL411942

C[C@@H](N)P(=O)(O)C[C@@H](Cc1ccccc1)C(=O)O CHEMBL405913

N[C@H](Cc1ccccc1)P(=O)(O)C[C@@H](Cc1ccccc1)C(=O)O CHEMBL412123

CC(=O)N[C@@H](CC(C)C)C(=O)N1CCC[C@@H]1P(=O)(O)C[C@@H](Cc1ccccc1)C(=O)O CHEMBL260273

C[C@H](CP(=O)(O)[C@H]1CCCN1C(=O)OCc1ccccc1)C(=O)O CHEMBL409713

CC(=O)N[C@@H](CCC(=O)O)C(=O)N1CCC[C@@H]1P(=O)(O)C[C@@H](Cc1ccccc1)C(=O)O  
CHEMBL263663

CC(=O)N[C@@H](Cc1c[nH]cn1)C(=O)N[C@H](CC(C)C)P(=O)(O)C[C@@H](Cc1ccccc1)C(=O)O  
CHEMBL408448

CC(=O)N[C@H](C(=O)N1CCC[C@@H]1P(=O)(O)C[C@@H](Cc1ccccc1)C(=O)O)C(C)C CHEMBL411052

CC(=O)N[C@@H](Cc1ccc(O)cc1)C(=O)N1CCC[C@@H]1P(=O)(O)C[C@@H](Cc1ccccc1)C(=O)O  
CHEMBL410509

CC(C)C[C@H](CP(=O)(O)[C@H]1CCCN1C(=O)OCc1ccccc1)C(=O)O CHEMBL411298

CC(=O)N[C@@H](Cc1c[nH]cn1)C(=O)N1CCC[C@@H]1P(=O)(O)CC(Cc1cc(-c2ccccc2)no1)C(=O)O  
CHEMBL409105

CC[C@@H](C)[C@H](S)C(=O)N[C@@H](Cc1ccc(OCc2ccccc2)cc1)C(=O)O CHEMBL254703

CC[C@@H](C)[C@H](S)C(=O)N[C@@H](Cc1ccc2ccccc2c1)C(=O)O CHEMBL253428

CC[C@@H](C)[C@H](S)C(=O)N[C@@H](Cc1ccc(OCc2ccc(F)c(F)c2)cc1)C(=O)O CHEMBL251808

CC[C@@H](C)[C@H](S)C(=O)NCC(=O)O CHEMBL401086

CC(=O)N[C@@H](CC(C)C)C(=O)N[C@H](Cc1ccccc1)P(=O)(O)C[C@@H](Cc1ccccc1)C(=O)O CHEMBL408705

CC(=O)N[C@@H](Cc1ccccc1)C(=O)N1CCC[C@@H]1P(=O)(O)C[C@@H](Cc1ccccc1)C(=O)O  
CHEMBL258698

O=C(N[C@H](Cc1ccccc1)P(=O)(O)C[C@@H](Cc1ccccc1)C(=O)O)OCc1ccccc1 CHEMBL258464

CC(=O)N[C@@H](C)C(=O)N1CCC[C@@H]1P(=O)(O)C[C@@H](Cc1ccccc1)C(=O)O CHEMBL409721

O=C(O)[C@H](Cc1ccccc1)CP(=O)(O)[C@H]1CCCN1C(=O)OCc1ccccc1 CHEMBL260677

C[C@@H](NC(=O)OCc1ccccc1)P(=O)(O)C[C@@H](Cc1ccccc1)C(=O)O CHEMBL258683

O=C(N[C@@H](Cc1ccc(-c2ccccc2)cc1)C(=O)O)[C@@H](S)CCc1ccccc1 CHEMBL402987

O=C(O)[C@H](Cc1ccc(-c2ccccc2)cc1)NC(=O)[C@@H](S)C1CCC1 CHEMBL257229

CC(C)[C@H](S)C(=O)N[C@@H](Cc1ccc(-c2ccccc2)cc1)C(=O)O CHEMBL269997

CC(=O)CNC(=O)[C@H](CC(=O)O)NC(=O)[C@H](Cc1ccc(O)cc1)NC(=O)[C@H](CO)NC(=O)[C@H](Cc1c[nH]cn1)NC(=O)[C@@H]1CSCC[C@H](NC(=O)[C@@H](NC(=O)[C@H](Cc2ccc(O)cc2)NC(=O)[C@@H]2CCCN2C(=O)[C@H](CC(=O)O)NC(=O)[C@@H]2CCCN2C(=O)[C@H](CCC(=O)O)NC(=O)CNC(=O)CNC(=O)CN)[C@@H](C)O)C(=O)N[C@@H](CCCCN)C(=O)N[C@@H](Cc2c[nH]c3ccccc23)C(=O)N[C@@H](Cc2c[nH]c3ccccc23)C(=O)N2CCC[C@H]2C(=O)N[C@@H](Cc2ccc(O)cc2)C(=O)N[C@@H](Cc2ccc(O)cc2)C(=O)N[C@@H](CCCNC(=N)N)C(=O)N[C@@H](CC(C)C)C(=O)N2CCC[C@H]2C(=O)N[C@@H](CO)C(=O)N1 CHEMBL436639

Cc1nnc(S/C(=C/c2ccc(-c3cc(Cl)ccc3C)o2)C(=O)O)[nH]1 CHEMBL252417

CC(C)C[C@H](N[C@@H](Cc1cncn1Cc1cc(Cl)cc(Cl)c1)C(=O)O)C(=O)O CHEMBL429844

CNC(=O)[C@H](Cc1c[nH]cn1)NC(=O)CN(CCCc1ccccc1)CC(=O)O CHEMBL3235416

NCCNCCN1CC1 CHEMBL398940

**Table S1.** Top 20 compound from Enamine SSC, showcasing visualizations of poses in ACE2 binding pocket.

| # | ID          | Score  | 2d diagram of interaction                                                            | 3d visualization of interaction                                                       |
|---|-------------|--------|--------------------------------------------------------------------------------------|---------------------------------------------------------------------------------------|
| 1 | Z2831426920 | -35,38 | 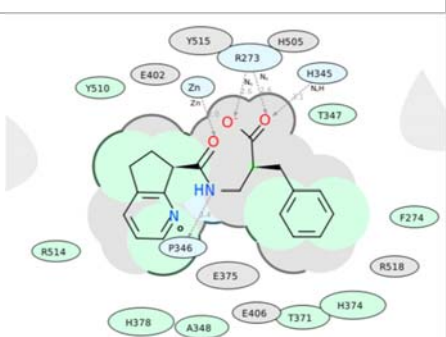 |  |

|   |             |            |  |  |
|---|-------------|------------|--|--|
| 2 | Z3681209542 | -<br>26,96 |  |  |
| 3 | Z3681208436 | -<br>32,95 |  |  |
| 4 | Z3681332013 | -<br>26,15 |  |  |
| 5 | Z3969355209 | -<br>38,31 |  |  |
| 6 | Z3681736600 | -<br>34,15 |  |  |

|    |             |            |                                                                                     |                                                                                       |
|----|-------------|------------|-------------------------------------------------------------------------------------|---------------------------------------------------------------------------------------|
| 7  | Z3681207877 | -<br>30,48 | 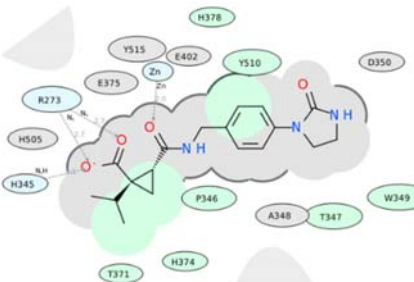   |    |
| 8  | Z3681593370 | -<br>27,76 |    |    |
| 9  | Z3681369109 | -<br>25,08 |   |   |
| 10 | Z4188337437 | -<br>33,82 |  |  |



|    |             |        |  |  |
|----|-------------|--------|--|--|
| 11 | Z3037294184 | -30,6  |  |  |
| 12 | Z4549268235 | -34,46 |  |  |
| 13 | Z4361984504 | -33,6  |  |  |
| 14 | Z3681806363 | -35,03 |  |  |
| 15 | Z3681799936 | -22,59 |  |  |

|    |             |        |  |  |
|----|-------------|--------|--|--|
| 16 | Z4602008618 | -29    |  |  |
| 17 | Z3466179106 | -26,43 |  |  |
| 18 | Z4221819990 | -40,66 |  |  |
| 19 | Z4561748167 | -32,92 |  |  |



|    |             |       |                                                                                   |                                                                                     |
|----|-------------|-------|-----------------------------------------------------------------------------------|-------------------------------------------------------------------------------------|
| 20 | Z4119544425 | -34,1 | 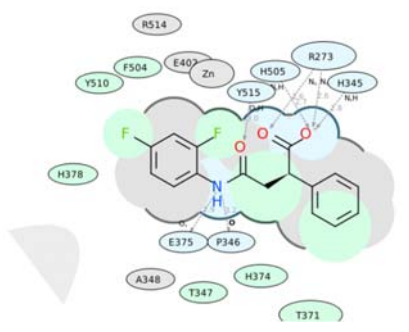 |  |
|----|-------------|-------|-----------------------------------------------------------------------------------|-------------------------------------------------------------------------------------|

**Table S2.** Top 20 compounds from Enamine RDB, showcasing visualizations of poses in ACE2 binding pocket.

| # | ID          | Score  | 2d diagram of interaction                                                            | 3d visualization of interaction                                                       |
|---|-------------|--------|--------------------------------------------------------------------------------------|---------------------------------------------------------------------------------------|
| 1 | Z1991725061 | -37.32 | 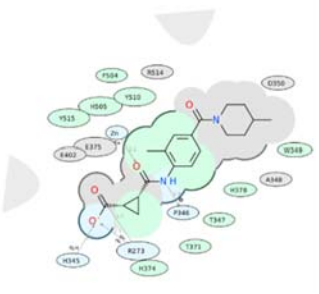   |   |
| 2 | Z2396153450 | -37.86 |  |  |

3 Z4422831009 -34.2

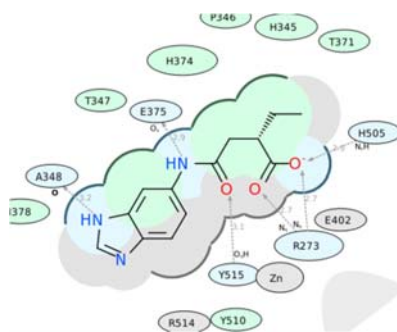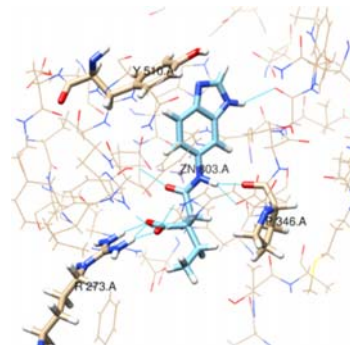

4 Z2899432355 -37.81

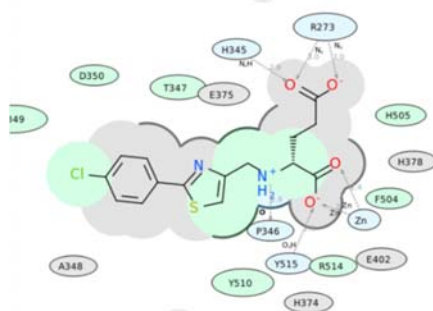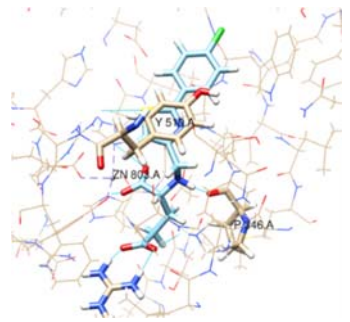

5 Z2793145343 -29.9

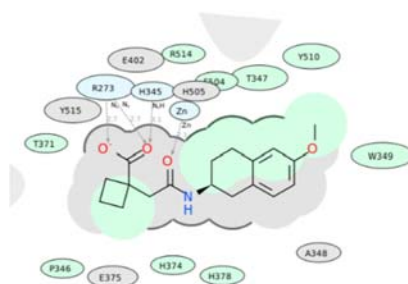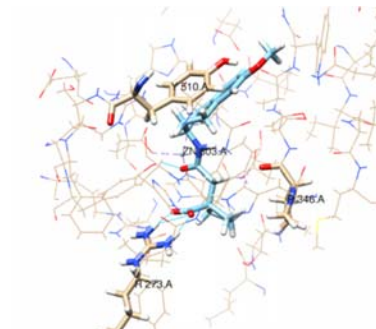

6 Z2396152156 -34.8

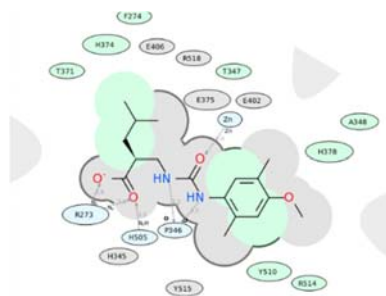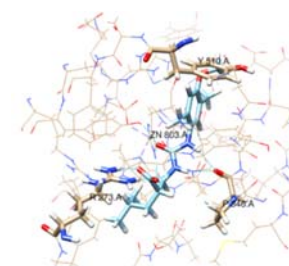

7 Z3510691032 -28.99

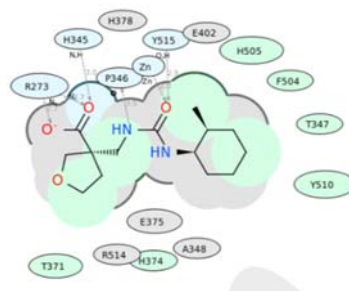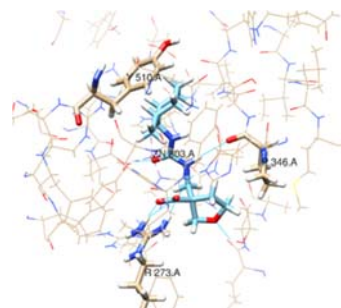

8 PV-002719568598 -30.33

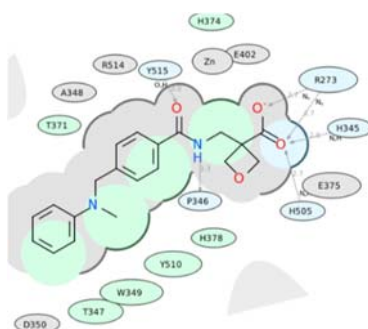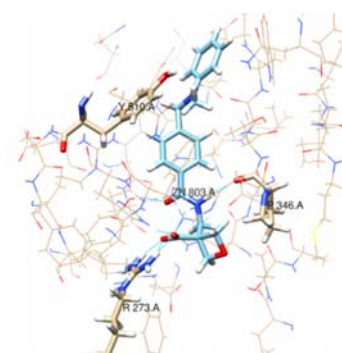

9 Z2610472638 -36.86

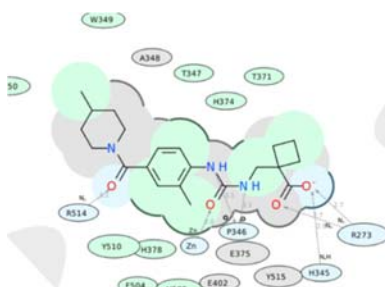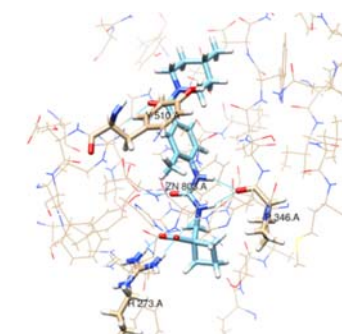

10 Z2596054371 -28.65

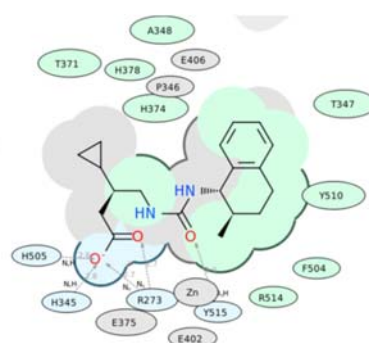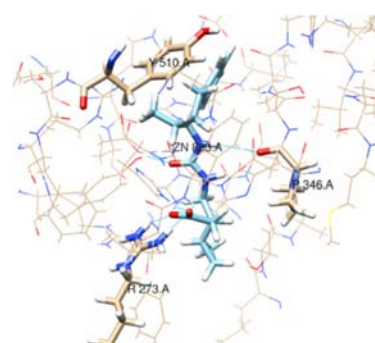

11 PV- -39.26  
002769423394

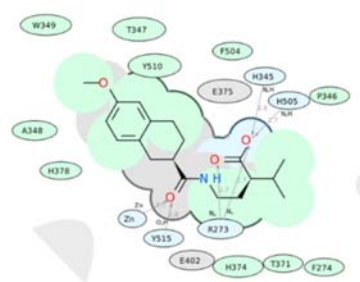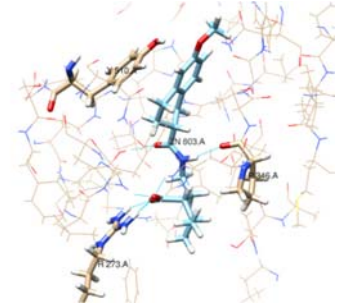

12 Z2596042648 -29.59

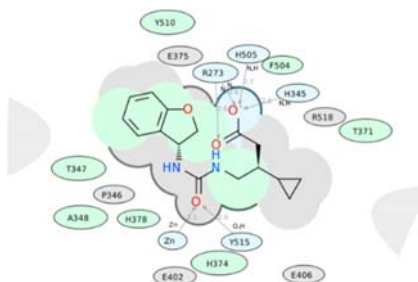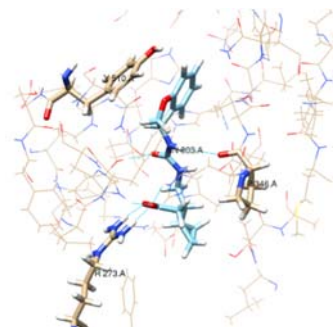

13 Z4422771675 -34.34

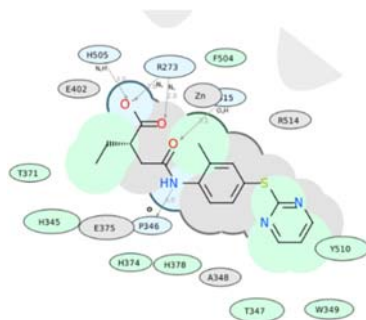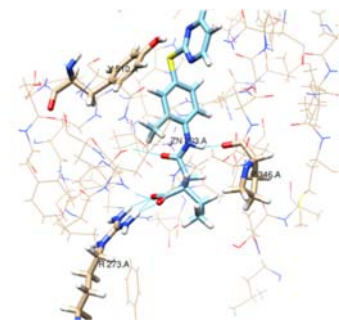

14 Z1213003608 -32.94

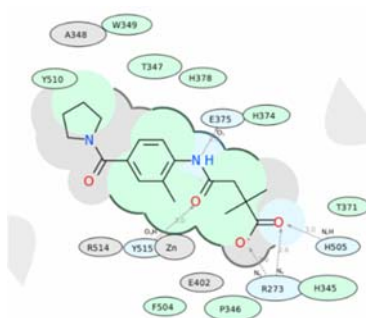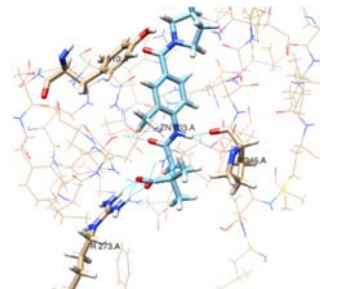



15 PV- -34.78  
002989187384

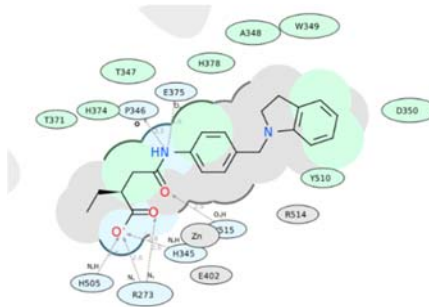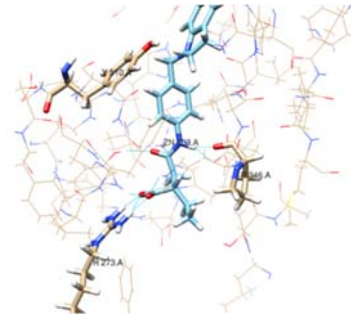

16 Z3654114554 -32.68

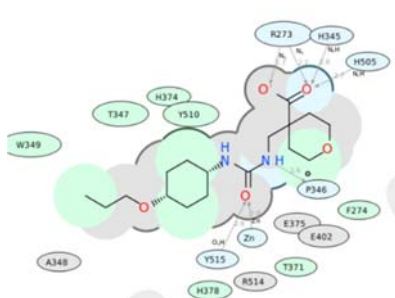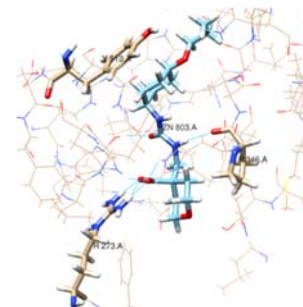

17 1Z2493059739 -38.68

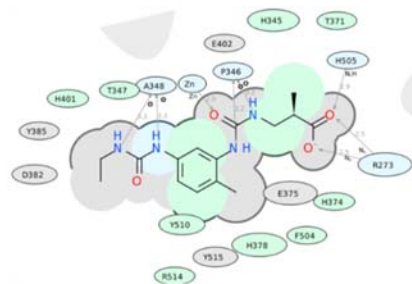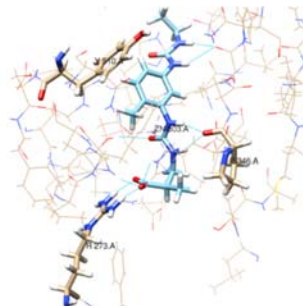

18 Z3510749222 -28.1

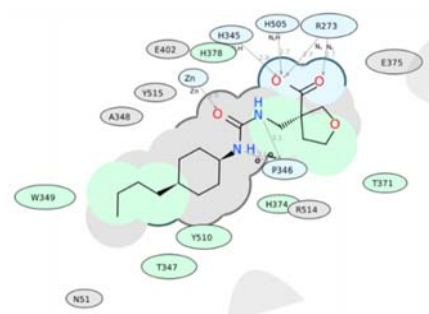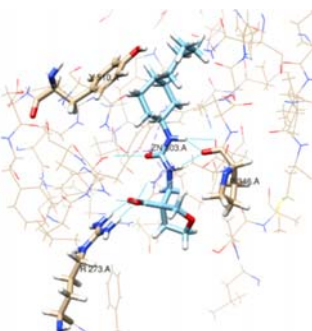

19      Z3390587460      -33.61

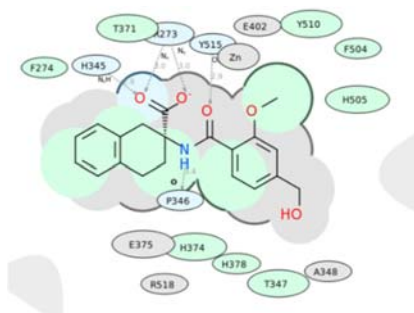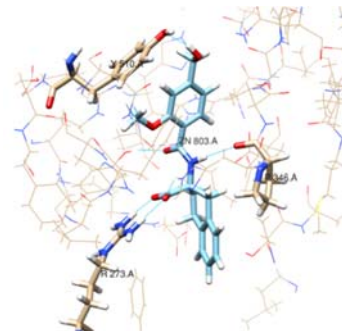

20      Z2362216591      -40.83

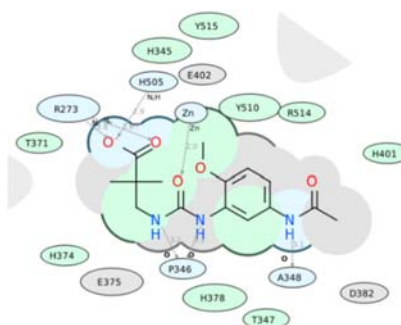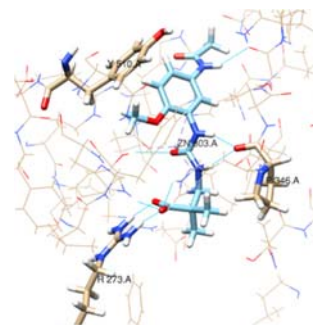

Supplement: s1 [file s1]
